# Supplementary material for: Evaluation of Antibody Response in Symptomatic and Asymptomatic COVID-19 Patients and Diagnostic Assessment of New IgM/IgG ELISA Kits
Source: PubMed Central journal article supplement (PMC7913500; doi:10.3390/pathogens10020161), 2021-02-03

## Supplementary Materials

**Table S1.** The diagnostic assessment of IgG and IgM ELISA tests with RT-PCR at the three-time intervals ( $\leq 14$ , 14-30,  $>30$  days) and in symptomatic/asymptomatic COVID-19 patients (n=291).

| Diagnostic assessment                         | IgG ELISA                  |                            |                            |                            |                            | IgM ELISA                 |                           |                           |                            |
|-----------------------------------------------|----------------------------|----------------------------|----------------------------|----------------------------|----------------------------|---------------------------|---------------------------|---------------------------|----------------------------|
|                                               | EDI                        | NovaLisa                   | AnshLabs                   | DiaPro                     | Lionex                     | EDI                       | NovaLisa                  | AnshLabs                  | Lionex                     |
| Sensitivity $\leq 14$ DPSO/DPD <sup>1</sup>   | 49.6% (59/119, 40.6-58.6)  | 61.0% (61/100, 51.4-70.6)  | 78.2% (93/119, 70.7-85.6)  | 48.7% (58/119, 39.8-57.7)  | 58.6% (58/99, 48.9-68.3)   | 48.7% (58/119, 39.8-57.7) | 46.2% (55/119, 37.3-55.2) | 53.8% (64/119, 44.8-62.8) | 66.4% (79/119, 57.9-74.9)  |
| Sensitivity 14-30 DPSO/DPD <sup>1</sup>       | 61.8% (34/55, 49.0-74.7)   | 81.5% (44/54, 71.1-91.8)   | 83.6% (46/55, 73.9-93.4)   | 60.0% (33/55, 47.1-72.9)   | 81.5% (44/54, 71.1-91.8)   | 34.5% (20/55, 22.0-47.1)  | 29.1% (16/55, 17.1-41.1)  | 38.2% (21/55, 25.3-51.0)  | 61.8% (34/55, 49.0-74.7)   |
| Sensitivity $>30$ DPSO/DPD <sup>1</sup>       | 76.1% (89/117, 68.3-83.8)  | 90.0% (99/110, 84.4-95.6)  | 95.7% (112/117, 92.1-99.4) | 53.5% (38/71, 41.9-65.1)   | 96.6% (113/117, 93.3-99.9) | 10.3% (12/117, 4.8-15.8)  | 12.8% (15/117, 6.8-18.9)  | 6.8% (8/117, 2.3-11.4)    | 47.9% (56/117, 38.8-56.9)  |
| Sensitivity in symptomatic COVID-19 patients  | 71.4% (104/147, 64.1-78.7) | 84.1% (111/132, 77.9-90.3) | 89.1% (131/147, 84.1-94.2) | 67.3% (99/147, 59.8-74.9)  | 84.1% (111/132, 77.9-90.3) | 52.4% (77/147, 44.3-60.5) | 45.6% (67/147, 37.5-53.6) | 57.1% (84/147, 49.1-65.1) | 75.5% (111/147, 68.6-82.5) |
| Sensitivity in asymptomatic COVID-19 patients | 56.0% (65/116, 47.0-65.1)  | 67.9% (74/109, 59.1-76.7)  | 86.2% (100/116, 79.9-92.5) | 24.3% (18/70, 14.2-34.3)   | 71.6% (83/116, 63.3-79.8)  | 7.8% (9/116, 2.9-12.6)    | 13.8% (16/116, 7.5-20.1)  | 3.4% (4/116, 0.13-6.8)    | 39.7% (46/116, 30.8-48.6)  |
| Overall sensitivity                           | 62.5% (182/291, 57.0-68.1) | 77.6% (204/263, 72.5-82.6) | 86.3% (251/291, 82.3-90.2) | 52.7% (129/245, 46.4-58.9) | 80.0% (216/270, 75.2-84.8) | 30.6% (89/291, 25.3-35.9) | 29.6% (86/291, 24.3-34.8) | 31.6% (92/291, 26.3-37.0) | 58.4% (170/291, 52.8-64.1) |
| Overall agreement with RT-PCR                 | 72.9% (68.6-77.2)          | 83.5% (79.8-87.2)          | 85.6% (82.2-89.0)          | 60.2% (55.1-65.2)          | 85.3% (81.8-88.9)          | 50.5% (45.6-55.3)         | 46.8% (42.0-51.7)         | 50.0% (45.2-54.8)         | 67.1% (62.5-71.6)          |
| Positive predictive value                     | 98.9% (97.9-99.9)          | 98.1% (96.7-99.5)          | 93.0% (90.5-95.4)          | 81.6% (77.6-85.6)          | 98.6% (97.5-99.8)          | 98.9% (97.8-99.9)         | 86.9% (83.6-90.1)         | 93.9% (91.6-96.2)         | 92.4% (89.8-94.9)          |
| Negative predictive value                     | 51.8% (46.9-56.6)          | 66.1% (61.3-70.8)          | 71.4% (67.1-75.8)          | 43.7% (38.6-48.8)          | 68.2% (63.6-72.9%)         | 36.9% (32.2-41.5)         | 34.1% (29.5-38.7)         | 36.2% (31.6-40.9)         | 46.5% (41.6-51.3)          |

<sup>1</sup>DPSO: Days post symptoms onset, DPD: days post diagnosis

**Figure S1.** Assays sensitivity according to time of sampling after symptoms onset or positive SARS-CoV-2 RT-PCR test from only symptomatic COVID-19 patients. Chi-square test was used to detect the presence of a statistically significant difference in the sensitivity between the time intervals in each assay.

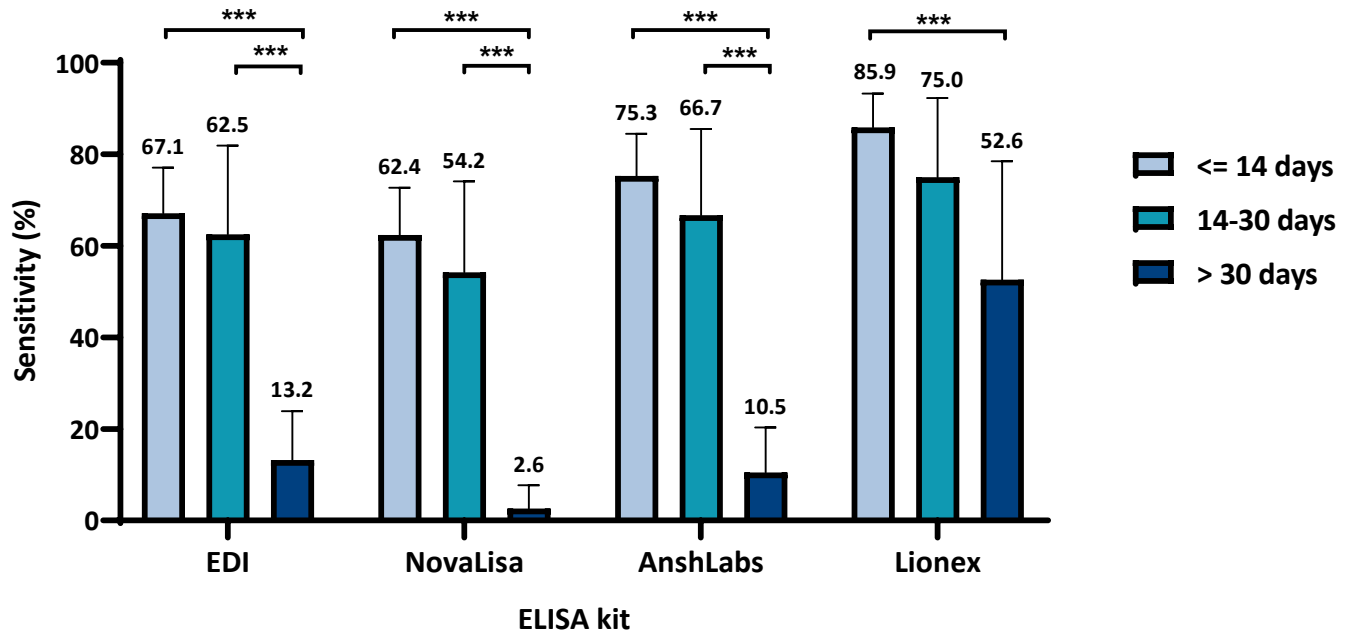

Supplement: pathogens-10-00161-s001.pdf [file pathogens-10-00161-s001.pdf]
